# Supplementary material
Source: publisher site journal article supplement (https://www.dovepress.com/article/supplementary_file/263733/263733-Table-S2_1.xlsx)
Supplement: Supplementary file 1 [file 263733-Table-S2_1.xlsx]

## Sheet: MIR4458HG
Table S2
Candidate lncRNA	Correlated mRNAs
MIR4458HG	CHADL
MIR4458HG	ECHDC2
MIR4458HG	CDKN1C
MIR4458HG	ATP5J
MIR4458HG	TSPAN7
MIR4458HG	TMEM220

## Sheet: LINC01235
Table S2
Candidate lncRNA	Correlated mRNAs
LINC01235	BGN
LINC01235	P4HA3
LINC01235	FAP
LINC01235	FNDC1
LINC01235	NOX4
LINC01235	COL3A1
LINC01235	THY1
LINC01235	CHST1
LINC01235	INHBA
LINC01235	CTHRC1
LINC01235	ADAM12
LINC01235	CHSY3
LINC01235	COL1A1
LINC01235	SPARC
LINC01235	COL8A1
LINC01235	COL1A2
LINC01235	THBS2
LINC01235	LOX
LINC01235	SULF1
LINC01235	TIMP1
LINC01235	OLFML2B
LINC01235	FOXS1
LINC01235	PDGFRB
LINC01235	COL5A2
LINC01235	COL10A1
LINC01235	CPXM1
LINC01235	LZTS1
LINC01235	FN1
LINC01235	ADAMTS2
LINC01235	COL6A3
LINC01235	SFRP4
LINC01235	COL4A1
LINC01235	CDH11
LINC01235	SLC11A1
LINC01235	ADAMTS12
LINC01235	COL12A1
LINC01235	VCAN
LINC01235	DGKI
LINC01235	WISP1
LINC01235	SERPINE1
LINC01235	CLEC5A
LINC01235	COL5A1
LINC01235	C1QTNF6
LINC01235	CCDC80
LINC01235	BMP1
LINC01235	ACAN
LINC01235	PODNL1
LINC01235	COL11A1
LINC01235	NOTCH3
LINC01235	FGF7
LINC01235	P2RY6
LINC01235	ABCC9
LINC01235	SEMA5B
LINC01235	ZNF385D
LINC01235	OXTR
LINC01235	MFAP2
LINC01235	MXRA5
LINC01235	SERPINH1
LINC01235	ITGA11
LINC01235	GAS1
LINC01235	ANGPT2
LINC01235	FCGR1A
LINC01235	ZNF469
LINC01235	ADAMTS14
LINC01235	WNT2
LINC01235	CEMIP
LINC01235	CSMD2
LINC01235	PODXL
LINC01235	ITGAX
LINC01235	ANOS1
LINC01235	BNC2
LINC01235	TWIST2
LINC01235	VSTM4
LINC01235	CETP
LINC01235	OSCAR
LINC01235	FCGR2A
LINC01235	IL11
LINC01235	CORIN
LINC01235	MSR1
LINC01235	LOXL2
LINC01235	GLI3
LINC01235	TREM1
LINC01235	TREM2
LINC01235	SPP1
LINC01235	STC2
LINC01235	RHOJ
LINC01235	FAM19A5
LINC01235	COL14A1
LINC01235	OLR1
LINC01235	SYNDIG1
LINC01235	CHI3L1
LINC01235	GALNT15
LINC01235	F2R
LINC01235	CPXM2
LINC01235	DDR2
LINC01235	CAVIN1
LINC01235	CILP2
LINC01235	FCGR3A
LINC01235	ECEL1
LINC01235	EVA1A
LINC01235	LEF1
LINC01235	IL24
LINC01235	KIF26B
LINC01235	DIO2
LINC01235	AQP9
LINC01235	COMP
